# Supplementary material for: The Efficacy of IDegLira (Insulin Degludec/Liraglutide Combination) in Adults with Type 2 Diabetes Inadequately Controlled with a GLP-1 Receptor Agonist and Oral Therapy: DUAL III Randomized Clinical Trial
Source: Springer Nature journal article supplement (doi:10.1007/s13300-016-0218-3), 2016-12-10
Supplement: MOESM2 [file 11915894]

## Supplementary data

**Supplementary Table 1: Inclusion and Exclusion criteria:**

| <b>Inclusion criteria</b>                                                                                                                                                                                                                                                                                                                                                                                                                                                                                                                                             |
|-----------------------------------------------------------------------------------------------------------------------------------------------------------------------------------------------------------------------------------------------------------------------------------------------------------------------------------------------------------------------------------------------------------------------------------------------------------------------------------------------------------------------------------------------------------------------|
| Informed consent obtained before any trial-related activities. Trial-related activities are any procedures that are carried out as part of the trial, including activities to determine suitability for the trial                                                                                                                                                                                                                                                                                                                                                     |
| Type 2 diabetes                                                                                                                                                                                                                                                                                                                                                                                                                                                                                                                                                       |
| Male or female $\geq 18$ years of age                                                                                                                                                                                                                                                                                                                                                                                                                                                                                                                                 |
| HbA <sub>1c</sub> 7.0–9.0% (53–75 mmol/mol) (both inclusive)                                                                                                                                                                                                                                                                                                                                                                                                                                                                                                          |
| Treatment with daily GLP-1RA at maximum dose according to local label (i.e. 1.8 mg once-daily liraglutide or 10 microgram twice-daily exenatide) or documented maximum tolerated dose (i.e. 1.2 mg OD liraglutide or 5 microgram BID exenatide) in combination with a stable daily dose of metformin ( $\geq 1500$ mg or documented maximum tolerated dose) $\pm$ stable daily dose of pioglitazone ( $\geq 30$ mg) $\pm$ stable daily dose of sulfonylurea ( $\geq$ half of the max approved dose according to local label) $\geq 90$ days prior to screening visit. |
| Body mass index $\leq 40$ kg/m <sup>2</sup>                                                                                                                                                                                                                                                                                                                                                                                                                                                                                                                           |
| Able and willing to adhere to the protocol including performing self-monitored plasma glucose profiles, to keep a trial diary and to use pre-filled pen device                                                                                                                                                                                                                                                                                                                                                                                                        |
| <b>Exclusion criteria</b>                                                                                                                                                                                                                                                                                                                                                                                                                                                                                                                                             |
| Known or suspected hypersensitivity to trial product(s) or related products                                                                                                                                                                                                                                                                                                                                                                                                                                                                                           |
| Previous participation in this trial. Participation is defined as randomization                                                                                                                                                                                                                                                                                                                                                                                                                                                                                       |
| Females of child-bearing potential who are pregnant, breast-feeding or intend to become pregnant or are not using adequate contraceptive methods (adequate contraceptive measures as required by local law or practice)                                                                                                                                                                                                                                                                                                                                               |
| Receipt of any investigational medicinal product within 30 days prior to screening visit (Visit 1)                                                                                                                                                                                                                                                                                                                                                                                                                                                                    |
| Use of any drug (except metformin, pioglitazone, sulfonylurea and GLP-1RA) which in the investigator's opinion could interfere with the blood glucose level (e.g. systemic corticosteroids).                                                                                                                                                                                                                                                                                                                                                                          |
| Treatment with any insulin regimen (short term treatment due to intercurrent illness including gestational diabetes is allowed at the discretion of the investigator)                                                                                                                                                                                                                                                                                                                                                                                                 |
| Impaired liver function, defined as alanine aminotransferase (ALAT) $\geq 2.5$ times upper normal range (UNR)                                                                                                                                                                                                                                                                                                                                                                                                                                                         |
| Impaired renal function defined as serum-creatinine $\geq 133$ $\mu$ mol/L (1.5 mg/dL) for males and $\geq 125$ $\mu$ mol/L (1.4 mg/dL) for females, or as allowed according to local contraindications for metformin                                                                                                                                                                                                                                                                                                                                                 |
| Screening calcitonin $\geq 50$ ng/L                                                                                                                                                                                                                                                                                                                                                                                                                                                                                                                                   |
| Personal or family history of medullary thyroid carcinoma (MTC) or multiple endocrine neoplasia type 2 (MEN2)                                                                                                                                                                                                                                                                                                                                                                                                                                                         |
| Cardiovascular disorders defined as; congestive heart failure (New York Heart Association (NYHA) class III-IV), diagnosis of unstable angina pectoris, cerebral stroke and/or myocardial infarction within the past 52 weeks prior to Visit 1 and/or planned coronary, carotid or peripheral artery revascularisation procedures                                                                                                                                                                                                                                      |
| Severe uncontrolled treated or untreated hypertension (systolic blood pressure $\geq 180$ mm Hg or diastolic blood pressure $\geq 100$ mm Hg)                                                                                                                                                                                                                                                                                                                                                                                                                         |
| Proliferative retinopathy requiring acute treatment or maculopathy (macular edema) according to the investigator's opinion                                                                                                                                                                                                                                                                                                                                                                                                                                            |
| Subjects with a clinical significant, active (during the past 12 months) disease of the gastrointestinal, pulmonary, endocrinological (except for the type 2 diabetes), neurological, genitourinary or haematological system that in the opinion of the Investigator, may confound the results of the trial or pose additional risk in administering trial product                                                                                                                                                                                                    |
| Mental incapacity, unwillingness or language barrier precluding adequate understanding of the trial procedures or cooperation with the trial personnel                                                                                                                                                                                                                                                                                                                                                                                                                |
| Known or suspected abuse of prescription drugs, alcohol or illicit substances                                                                                                                                                                                                                                                                                                                                                                                                                                                                                         |
| History of chronic pancreatitis or idiopathic acute pancreatitis                                                                                                                                                                                                                                                                                                                                                                                                                                                                                                      |
| Suffer from a life threatening disease including malignant neoplasms and medical history of malignant neoplasms within the last 5 years (except basal and squamous cell skin cancer)                                                                                                                                                                                                                                                                                                                                                                                  |

**Supplementary Table 2: Titration algorithm**

| Fasting plasma glucose |       | Dose adjustment<br>Dose steps |
|------------------------|-------|-------------------------------|
| mmol/L                 | mg/dL |                               |
| <4.0                   | <72   | -2                            |
| 4.0–5.0                | 72–90 | 0                             |
| >5.0                   | >90   | +2                            |

**Supplementary Figure 1: Patient disposition.** FAS, full analysis set; GLP-1RA, glucagon-like peptide-1 receptor agonist; IDegLira, insulin degludec/liraglutide combination; SAS, safety analysis set.

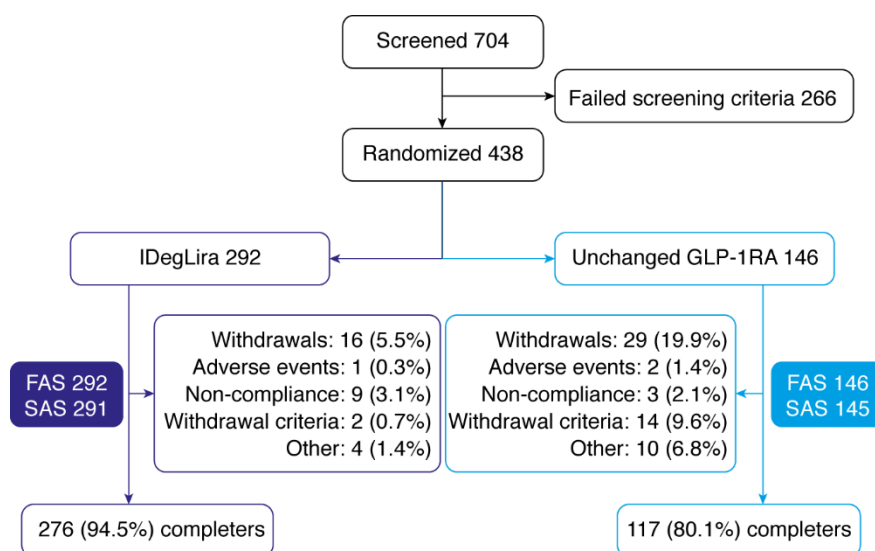

**Supplementary Table 3: Hypoglycemia**

|                     | IDegLira<br><i>n</i> = 291 |        |       | Unchanged GLP-1RA<br><i>n</i> = 145 |        |       | Estimated rate ratio<br>[95% CI]       |
|---------------------|----------------------------|--------|-------|-------------------------------------|--------|-------|----------------------------------------|
|                     | N (%)                      | Events | Rate  | N (%)                               | Events | Rate  |                                        |
| Severe              | 1 (0.3)                    | 1      | 0.007 | 0 (0)                               | 0      | 0     | N/A                                    |
| Confirmed           | 93 (32)                    | 397    | 2.82  | 4 (2.8)                             | 8      | 0.12  | 25.36 [10.6; 60.5], <i>p</i> < 0.001   |
| Nocturnal confirmed | 32 (11)                    | 64     | 0.45  | 1 (0.7)                             | 1      | 0.015 | 32.82 [4.13; 261.04], <i>p</i> < 0.001 |

N, number of subjects with  $\geq 1$  event; %, percentage of subjects; rate, unadjusted event rate (episodes per patient-year of exposure). Data are based on the SAS. Estimated rate ratio based on FAS. FAS, full analysis set; GLP-1RA, glucagon-like peptide-1 receptor agonist; IDegLira, insulin degludec/liraglutide combination; PYE, patient years of exposure; SAS, safety analysis set.

**Supplementary Table 4: Hypoglycemia by pre-trial oral anti-diabetic drugs**

|           | IDegLira + met ± pio<br>n = 223 |        |       | Unchanged GLP-1RA + met ± pio<br>n = 111 |        |      | IDegLira + met + SU ± pio n = 68 |        |      | Unchanged GLP-1RA + met + SU ± pio n = 34 |        |      |
|-----------|---------------------------------|--------|-------|------------------------------------------|--------|------|----------------------------------|--------|------|-------------------------------------------|--------|------|
|           | N (%)                           | Events | Rate  | N (%)                                    | Events | Rate | N (%)                            | Events | Rate | N (%)                                     | Events | Rate |
| Severe    | 1 (0.4)                         | 1      | 0.009 | 0 (0)                                    | 0      | 0    | 0 (0)                            | 0      | 0    | 0 (0)                                     | 0      | 0    |
| Confirmed | 62 (28)                         | 189    | 1.75  | 0 (0)                                    | 0      | 0    | 31 (46)                          | 208    | 6.34 | 4 (12)                                    | 8      | 0.51 |

N, number of subjects with ≥1 event; %, percentage of subjects; rate, unadjusted event rate (episodes per patient-year of exposure). Data are based on the SAS. Met, metformin, GLP-1RA, glucagon-like peptide-1 receptor agonist; IDegLira, insulin degludec/liraglutide combination; pio, pioglitazone; PYE, patient years of exposure; SAS; safety analysis set; SU, sulfonylurea.

**Supplementary Table 5: Lipase and amylase by treatment week**

|                     | IDegLira<br>n = 290       | Unchanged GLP-1RA<br>n = 145 |
|---------------------|---------------------------|------------------------------|
| <b>Lipase, U/L</b>  |                           |                              |
| Week 0              | 61.9 (44.3) [17.0; 388.0] | 57.3 (37.4) [17.0; 335.0]    |
| Week 12             | 68.0 (55.6) [14.0; 438.0] | 60.8 (39.7) [18.0; 286.0]    |
| Week 26             | 60.9 (40.1) [13.0; 418.0] | 55.5 (39.0) [17.0 429.0]     |
| <b>Amylase, U/L</b> |                           |                              |
| Week 0              | 63.9 (31.1) [13.0; 256.0] | 62.2 (31.6) [11.0; 225.0]    |
| Week 12             | 72.3 (37.7) [20.0; 291.0] | 63.3 (31.2) [20.0; 201.0]    |
| Week 26             | 70.1 (36.8) [23.0; 241.0] | 61.2 (26.3) [13.0; 176.0]    |

Values are mean (standard deviation) [min; max range]. N, number of subjects. Data are based on the SAS with LOCF. Met, metformin, GLP-1RA, glucagon-like peptide-1 receptor agonist; IDegLira, insulin degludec/liraglutide combination; LOCF, last observation carried forward; SAS; safety analysis set.

**Supplementary Table 6: Patient-reported outcomes**

| Score               | IDegLira (n = 291)<br>Observed score at EOT | Unchanged GLP-1RA (n = 146)<br>Observed score at EOT | IDegLira (n = 290)<br>Observed change from baseline | Unchanged GLP-1RA (n = 146)<br>Observed change from baseline | Estimated treatment contrast [95% CI] ANCOVA analysis IDegLira – GLP-1RA |
|---------------------|---------------------------------------------|------------------------------------------------------|-----------------------------------------------------|--------------------------------------------------------------|--------------------------------------------------------------------------|
| <b>TRIM-D</b>       |                                             |                                                      |                                                     |                                                              |                                                                          |
| Total score         | 82.3 ± 11.9                                 | 78.1 ± 13.9                                          | 8.7 ± 12.0                                          | 3.1 ± 12.2                                                   | 5.0 [2.9, 7.2];<br>p < 0.001                                             |
| Treatment burden    | 81.2 ± 15.9                                 | 76.6 ± 18.0                                          | 10.8 ± 18.8                                         | 5.7 ± 19.3                                                   | 5.0 [1.9; 8.0];<br>p = 0.002                                             |
| Daily life          | 84.5 ± 16.6                                 | 81.7 ± 18.7                                          | 6.3 ± 18.4                                          | 0.8 ± 18.2                                                   | 3.7 [0.5; 6.8];<br>p = 0.022                                             |
| Diabetes management | 72.0 ± 18.5                                 | 67.2 ± 20.2                                          | 10.9 ± 21.3                                         | 4.1 ± 19.8                                                   | 5.7 [2.2; 9.2];<br>p = 0.002                                             |

|                                    |             |             |            |            |                                        |
|------------------------------------|-------------|-------------|------------|------------|----------------------------------------|
| Compliance                         | 87.2 ± 14.0 | 84.4 ± 16.9 | 8.9 ± 17.3 | 4.3 ± 15.9 | 3.5 [0.8; 6.2];<br><i>p</i> = 0.010    |
| Psychological health               | 85.9 ± 14.8 | 80.5 ± 18.4 | 7.3 ± 14.7 | 1.4 ± 16.5 | 5.4 [2.7; 8.1];<br><i>p</i> < 0.001    |
| <b>DTSQs</b>                       |             |             |            |            |                                        |
| Treatment satisfaction total score | 32.5 ± 4.2  | 30.7 ± 5.9  | 3.1 ± 5.6  | 1.1 ± 5.0  | 2.0 [1.1, 2.8];<br><i>p</i> < 0.001    |
| Hyperglycemia                      | 1.5 ± 1.6   | 2.5 ± 2.0   | -1.8 ± 2.1 | -0.6 ± 1.9 | -1.0 [-1.4, -0.7];<br><i>p</i> < 0.001 |
| Hypoglycemia                       | 1.1 ± 1.5   | 0.7 ± 1.4   | 0.2 ± 1.7  | -0.1 ± 1.5 | 0.4 [0.1, 0.6];<br><i>p</i> = 0.006    |

Data are observed patient-reported outcome scores at 26 weeks, changes from baseline (LOCF), and estimated treatment contrast. Data are mean ± standard deviation unless otherwise indicated. TRIM-D: higher score indicates a better health state. DTSQs: higher scores indicate higher satisfaction; DTSQ hyperglycemia and hypoglycemia: higher scores indicate higher perceived frequency.

ANCOVA, analysis of covariance; CI, confidence interval; DTSQs, diabetes treatment satisfaction questionnaire status; EOT, end-of-trial; GLP-1RA, glucagon-like peptide-1 receptor agonist; IDegLira, insulin degludec/liraglutide combination; LOCF, last observation carried forward; TRIM-D, treatment-related impact measure–diabetes.
